# Supplementary material
Source: publisher figshare collection journal article supplement (https://future-science-group.figshare.com/ndownloader/files/34016624)
Supplement: Supplementary file 1 [file 34016624]

**Table A: Literature Search strategy**

Ovid-MEDLINE EMABSE Strategy

Run on July 16, 2019

| 1 | (cyber-knife or cyber knife or cyberknife or stereotactic body radiotherap*).mp. |
| --- | --- |
| 2 | meta-analysis.tw. |
| 3 | systematic review.tw. |
| 4 | (technology assessment* or HTA or HTAs).tw. |
| 5 | meta analysis/ |
| 6 | exp Meta-Analysis as Topic/ |
| 7 | exp "systematic review"/ |
| 8 | exp biomedical technology assessment/ |
| 9 | 2 or 3 or 4 or 5 or 6 or 7 or 8 |
| 10 | 1 and 9 |

Pubmed Strategy

Run on July 16, 2019

(((cyber-knife[Title/Abstract] OR cyber knife[Title/Abstract] OR cyberknife[Title/Abstract] OR stereotactic body radiotherap*[Title/Abstract]))) AND ((((((((meta-analysis[Text Word]) OR systematic review[Text Word]) OR ((technology assessment*[Text Word] OR HTA[Text Word] OR HTAs)[Text Word])) OR meta analysis[MeSH Terms]) OR Meta-Analysis[MeSH Major Topic]) OR systematic review[MeSH Major Topic]) OR biomedical technology assessment[MeSH Major Topic]))

**Table B: List of excluded studies**

| Author | Year | Title | Journal | Exclusion Reason |
| --- | --- | --- | --- | --- |
| Patel | 2017 | A systematic review reveals location specific toxicity rates after SRS for brainstem metastases | Neuro-Oncology | Data of CK was not specified |
| Chi | 2017 | Comparison of particle beam therapy and stereotactic body radiotherapy for early stage non-small cell lung cancer: A systematic review and hypothesis-generating meta-analysis | Radiotherapy and Oncology | Data of CK was not specified |
| Dabestani | 2014 | Local treatments for metastases of renal cell carcinoma: A systematic review | The Lancet Oncology | Data of CK was not specified |
| Dong | 2017 | Prognositc significance of SUV on pretreatment F-FDG PET/CT in early-stage non-small cell lung cancer treated with stereotactic body radiotherapy: A meta-analysis | Journal of Medical Imaging and Radiation Oncology | Data of CK was not specified |
| Guss | 2011 | Radiosurgery of glomus jugulare tumors: A meta-analysis | International Journal of Radiation Oncology Biology Physics | Data of CK was not specified |
| Husain | 2017 | Stereotactic body radiotherapy for de novo spinal metastases: Systematic review International Stereotactic Radiosurgery Society practice guidelines | Journal of Neurosurgery: Spine | Data of CK was not specified |
| Lagman | 2017 | Adjuvant Radiosurgery Versus Serial Surveillance Following Subtotal Resection of Atypical Meningioma: A Systematic Analysis | World Neurosurgery | Data of CK was not specified |
| Li | 2014 | Systematic review of SABR for oligometastatic breast cancer | Journal of Medical Imaging and Radiation Oncology | Data of CK was not specified |
| Manuzzi | 2017 | Stereotactic radiotherapy in hepatocellular carcinoma: a systematic review | Radiotherapy and Oncology | Data of CK was not specified |
| Mendez | 2017 | The Role of Stereotactic Ablative Body Radiotherapy in Gynaecological Cancers: A Systematic Review | Clinical Oncology | Data of CK was not specified |
| Palma | 2012 | Curative treatment of Stage i non-small-cell lung cancer in patients with severe COPD: Stereotactic radiotherapy outcomes and systematic review | International Journal of Radiation Oncology Biology Physics | Data of CK was not specified |
| Prins | 2017 | Renal Cell Carcinoma: Alternative Nephron-Sparing Treatment Options for Small Renal Masses, a Systematic Review | Journal of Endourology | Data of CK was not specified |
| Siva | 2010 | Stereotactic radiotherapy for pulmonary oligometastases: A systematic review | Journal of Thoracic Oncology | Data of CK was not specified |
| Smith | 2018 | Radiosurgery for Treatment of Renal Cell Metastases to Spine: A Systematic Review of the Literature | World Neurosurgery | Data of CK was not specified |
| Van | 2017 | Impact of SBRT on pain and local control for bone metastases: A systematic review and meta-analysis | Radiotherapy and Oncology | Data of CK was not specified |
| Wang | 2012 | The role of stereotactic radiosurgery in cavernous sinus hemangiomas: A systematic review and meta-analysis | Journal of Neuro-Oncology | Data of CK was not specified |
| Wen | 2017 | A Propensity-Matched Analysis of Outcomes of Patients with Clinical Stage I Non-Small Cell Lung Cancer Treated surgically or with stereotactic radiotherapy: A Meta-Analysis | Journal of Investigative Surgery | Data of CK was not specified |
| Yu | 2017 | Survival Outcome after Stereotactic Body Radiation Therapy and Surgery for Early Stage Non-Small Cell Lung Cancer: A Meta-Analysis | Journal of Investigative Surgery | Data of CK was not specified |
| Zhang | 2014 | Matched-pair comparisons of stereotactic body radiotherapy (SBRT) versus surgery for the treatment of early stage non-small cell lung cancer: A systematic review and meta-analysis | Radiotherapy and Oncology | Data of CK was not specified |
| Correa | 2019 | The Emerging Role of Stereotactic Ablative Radiotherapy for Primary Renal Cell Carcinoma: A Systematic Review and Meta-Analysis | European Urology Focus | Data of CK was not specified |
| Hamaji | 2018 | Surgery and stereotactic body radiotherapy for early stage non-small cell lung cancer: review of meta-analyses | Journal of Thoracic Disease | Data of CK was not specified |
| Gong | 2019 | Efficacy and safety of different fractions in stereotactic body radiotherapy for spinal metastases: A systematic review | Cancer Medicine | Data of CK was not specified |
| Zhang | 2019 | Stereotactic body radiation therapy or surgery for stage I–II non-small cell lung cancer treatment?—outcomes of a meta-analysis | Translational Cancer Research | Data of CK was not specified |
| Rim | 2018 | Comparison of radiation therapy modalities for hepatocellular carcinoma with portal vein thrombosis: A meta-analysis and systematic review | Radiotherapy and oncology | Data of CK was not specified |
| Naeem | 2018 | Role of stereotactic radiosurgery in the treatment of acromegaly | Journal of the Pakistan Medical Association | Data of CK was not specified |
| Rim | 2019 | Is stereotactic body radiotherapy for ultra-central lung tumor a feasible option? A systemic review and meta-analysis | International Journal of Radiation Biology | Data of CK was not specified |
| Li | 2019 | Stereotactic Body Radiotherapy Versus Surgery for Early-Stage Non-Small-Cell Lung Cancer | Journal of Surgical Research | Data of CK was not specified |
| Yu | 2019 | Stereotactic Body Radiotherapy for Centrally Located Primary Non-Small-Cell Lung Cancer: A Meta-Analysis | Clinical Lung Cancer | Data of CK was not specified |
| Lu | 2018 | Evaluating risk factors of radiation pneumonitis after stereotactic body radiation therapy in lung tumor: Meta-analysis of 9 observational studies | PLoS One | Data of CK was not specified |
| Rim | 2019 | Clinical feasibility and efficacy of stereotactic body radiotherapy for hepatocellular carcinoma: A systematic review and meta-analysis of observational studies | Radiotherapy and oncology | Data of CK was not specified |
| Wen | 2019 | A Propensity-Matched Analysis of Outcomes of Patients with Clinical Stage I Non-Small Cell Lung Cancer Treated surgically or with stereotactic radiotherapy: A Meta-Analysis | Journal of Investigative Surgery | Data of CK was not specified |
| Shaverdian | 2016 | Use of the neutrophil to lymphocyte ratio (NLR) and the platelet to lymphocyte ratio (PLR) for prognostication of patients with early-stage non-small cell lung cancer (NSCLC) treated with stereotactic body radiation therapy (SBRT): a systematic review | Clinical Lung Cancer | Data of CK was not specified |
| Lee | 2019 | Efficacy of stereotactic body radiotherapy for unresectable or recurrent cholangiocarcinoma: a meta-analysis and systematic review | Strahlentherapie und Onkologie | Data of CK was not specified |
| Alongi | 2018 | Stereotactic body radiotherapy for lung oligometastases: Literature review according to PICO criteria | Tumori | Data of CK was not specified |
| Dickhoff | 2018 | Salvage surgery for local recurrence after stereotactic body radiotherapy for early stage non-small cell lung cancer: a systematic review | Therapeutic Advances in Medical Oncology | Data of CK was not specified |
| Leon | 2019 | Observation or stereotactic radiosurgery for newly diagnosed vestibular schwannomas: A systematic review and meta-analysis | Journal of radiosurgery and SBRT | Data of CK was not specified |
| Fatima | 2019 | Stereotactic radiosurgery versus stereotactic radiotherapy in the management of intracranial meningiomas: a systematic review and meta-analysis | Neurosurgical Focus | Data of CK was not specified |
| Rim | 2019 | Is stereotactic body radiotherapy for ultra-central lung tumor a feasible option? A systemic review and meta-analysis | International Journal of Radiation Biology | Data of CK was not specified |
| Achard | 2020 | Radiotherapy treatment volumes for oligorecurrent nodal prostate cancer: a systematic review | Acta Oncologic | Data of CK was not specified |
| Lee | 2020 | Reirradiation using stereotactic body radiotherapy in the management of recurrent or second primary head and neck cancer: A meta-analysis and systematic review | Oral Oncology | Data of CK was not specified |
| Zhao | 2019 | Stereotactic Body Radiotherapy Combined with Transcatheter Arterial Chemoembolization versus Stereotactic Body Radiotherapy Alone as the First-Line Treatment for Unresectable Hepatocellular Carcinoma: A Meta-Analysis and Systematic Review | Chemotherapy | Data of CK was not specified |
| Fatima | 2020 | Stereotactic radiosurgery for head and neck paragangliomas: a systematic review and meta-analysis | Neurosurgical Review | Data of CK was not specified |
| Ree | 2020 | Cardiac radioablation—A systematic review | Heart Rhythm | Data of CK was not specified |
| Tetta | 2020 | Stereotactic Body Radiotherapy Versus Metastasectomy in Patients With Pulmonary Metastases From Soft Tissue Sarcoma | Clinical oncology : a journal of the Royal College of Radiologists | Data of CK was not specified |
| Messineo | 2020 | Meta-analysis on the utility of radiotherapy for the treatment of Ocular Melanoma | La Clinica terapeutica | Data of CK was not specified |
| Viani | 2020 | Stereotactic Body Radiotherapy for Oligometastatic Prostate Cancer Recurrence: A Meta-analysis | American journal of clinical oncology | Data of CK was not specified |
| Li | 2019 | Stereotactic Body Radiotherapy Versus Surgery for Early-Stage Non-Small-Cell Lung Cancer | The Journal of surgical research | Data of CK was not specified |
| Correa | 2019 | The Emerging Role of Stereotactic Ablative Radiotherapy for Primary Renal Cell Carcinoma: A Systematic Review and Meta-Analysis | European urology focus | Data of CK was not specified |
| Deodato | 2020 | Stereobody radiotherapy for nodal recurrences in oligometastatic patients: a pooled analysis from two phase I clinical trials | Clinical & experimental metastasis | Data of CK was not specified |
| Zhao | 2019 | Stereotactic Body Radiotherapy Combined with Transcatheter Arterial Chemoembolization versus Stereotactic Body Radiotherapy Alone as the First-Line Treatment for Unresectable Hepatocellular Carcinoma: A Meta-Analysis and Systematic Review | Chemotherapy | Data of CK was not specified |
| Grun | 2020 | Repeat Radiation for Local Recurrence of Head and Neck Tumors and in Prostate Cancer | Deutsches Ärzteblatt international | Data of CK was not specified |
| Willeke | 2020 | Epstein Barr virus associated smooth muscle tumors in the central nervous system: a case report and systematic review of the literature | Journal of neuro-oncology | Data of CK was not specified |
| Patel | 2020 | Plan evaluation indices: A journey of evolution | Reports of practical oncology and radiotherapy : journal of Greatpoland Cancer Center in Poznań and Polish Society of Radiation Oncology | Data of CK was not specified |
| Barrie | 2020 | Intramedullary Spinal Metastatic Renal Cell Carcinoma: Systematic Review of Disease Presentation, Treatment, and Prognosis with Case Illustration | World Neurosurg | Data of CK was not specified |
| Dobrzycka | 2019 | Stereotactic body radiation therapy for early-stage hepatocellular carcinoma - a systematic review on outcome | Acta oncologica | Data of CK was not specified |
| Gharwan | 2017 | Thymic epithelial tumors and metastasis to the brain: A case series and systematic review | Translational Lung Cancer Research | Not systematic review |
| Francolini | 2018 | Stereotactic body radiation therapy (SBRT) on renal cell carcinoma, an overview of technical aspects, biological rationale and current literature | Critical Reviews in Oncology Hematology | Not systematic review |
| Nguyen | 2017 | Outcomes of hypofractionated stereotactic radiotherapy for intracranial meningioma: A systematic review of the literature | International Journal of Radiation Oncology Biology Physics | Abstract only |
| Wang | 2017 | Outcomes of stereotactic body radiotherapy and surgery in treating early stage non-small cell lung cancer: A meta-analysis | Journal of Thoracic Oncology | Abstract only |
| Davari | 2016 | The effectiveness analysis of selected radiosurgery devices on treatment of cancer tumors and arteriovenous malformations: A systematic review | Value in Health | Abstract only |
| Sabanathan | 2015 | The use of stereotactic radiotherapy for bone metastases from renal cell carcinoma-a systematic review | Asia-Pacific Journal of Clinical Oncology | Abstract only |
| Dearden | 2014 | Comparison of mean overall survival (OS) and radiographic progression free survival (RPFS) based on matching adjusted indirect comparison of abiraterone acetate and enzalutamide for the treatment of castration-resistant prostate cancer in chemotherapy naïve patients | Value in Health | Abstract only |
| Jackson | 2019 | Stereotactic Body Radiotherapy for Localized Prostate Cancer: A Systematic Review and Meta-Analysis of Over 6,000 Patients Treated On Prospective Studies | International Journal of Radiation Oncology Biology Physics | Abstract only |
| Paix | 2018 | Easy and Fast Application to Assess the Cost-Effectiveness of Stereotactic Body Radiotherapy (SBRT) Compare to Lobectomy in Early Stage Non Small Cells Lung Cancer (NSCLC). | Radiotherapy and oncology | Abstract only |
| Wang | 2020 | Health economic evaluation of stereotactic body radiotherapy (SBRT) for hepatocellular carcinoma: a systematic review | Cost Effectiveness and Resource Allocation | Abstract only |
| Berger | 2017 | Microvascular Decompression Versus Stereotactic Radiosurgery for Trigeminal Neuralgia: A Decision Analysis | Cureus | Econometric model |
| Wang | 2020 | Health economic evaluation of stereotactic body radiotherapy (SBRT) for hepatocellular carcinoma: a systematic review | Cost effectiveness and resource allocation | Econometric model |
